# Supplementary material for: Attitudes towards Safe Listening Measures in Entertainment Venues: Results from an International Survey among Young Venue-Goers
Source: MDPI journal article supplement (doi:10.3390/ijerph182312860), 2021-12-06
Supplement: s1 [file s1]

### Survey on safe listening in entertainment venues

Thank you very much for your interest in participating in this survey.

The present survey is carried out by the World Health Organization (Geneva, Switzerland). Its objective is to investigate how people listen to music in entertainment venues (e.g., bars, clubs, concert halls, gyms, festivals) and their attitudes towards preventive measures and regulations in this context.

Completing the questionnaire will require about 5-7 minutes. Your participation to this survey is voluntary. You have the right to withdraw your participation at any time, without giving a reason, by simply closing the window of your browser. The results of this survey will be used in a completely anonymous manner.

For any question related to the survey or to your participation you can contact the study responsible Dr. Nicola Diviani at the University of Lucerne: [Nicola.Diviani@unilu.ch](mailto:Nicola.Diviani@unilu.ch).

ELECTRONIC CONSENT: Please confirm that you have read the information above and that you voluntarily agree to take part to the survey. \*

( ) I confirm that I have read the information above and that I voluntarily agree to take part to the survey

---

1. How often do you **visit entertainment venues** (e.g., bars, clubs, festivals, concert halls, gyms)?

- ☐ Never
- ☐ Less than once a year
- ☐ Once a year
- ☐ Several times a year
- ☐ Once a month
- ☐ Several times a month
- ☐ Once a week
- ☐ Several times a week
- ☐ Daily

2. For each of the entertainment venues listed below, please indicate **how often do you visit them.**

|                  | Less<br>than<br>once a<br>year | Once a<br>year        | Several<br>times a<br>year | Once a<br>month       | Several<br>times a<br>month | Once a<br>week        | Several<br>times a<br>week | Daily                 | I do<br>not<br>visit<br>this<br>venue |
|------------------|--------------------------------|-----------------------|----------------------------|-----------------------|-----------------------------|-----------------------|----------------------------|-----------------------|---------------------------------------|
| Bars             | <input type="radio"/>          | <input type="radio"/> | <input type="radio"/>      | <input type="radio"/> | <input type="radio"/>       | <input type="radio"/> | <input type="radio"/>      | <input type="radio"/> | <input type="radio"/>                 |
| Clubs            | <input type="radio"/>          | <input type="radio"/> | <input type="radio"/>      | <input type="radio"/> | <input type="radio"/>       | <input type="radio"/> | <input type="radio"/>      | <input type="radio"/> | <input type="radio"/>                 |
| Discos           | <input type="radio"/>          | <input type="radio"/> | <input type="radio"/>      | <input type="radio"/> | <input type="radio"/>       | <input type="radio"/> | <input type="radio"/>      | <input type="radio"/> | <input type="radio"/>                 |
| Concert<br>halls | <input type="radio"/>          | <input type="radio"/> | <input type="radio"/>      | <input type="radio"/> | <input type="radio"/>       | <input type="radio"/> | <input type="radio"/>      | <input type="radio"/> | <input type="radio"/>                 |
| Gyms             | <input type="radio"/>          | <input type="radio"/> | <input type="radio"/>      | <input type="radio"/> | <input type="radio"/>       | <input type="radio"/> | <input type="radio"/>      | <input type="radio"/> | <input type="radio"/>                 |
| Festivals        | <input type="radio"/>          | <input type="radio"/> | <input type="radio"/>      | <input type="radio"/> | <input type="radio"/>       | <input type="radio"/> | <input type="radio"/>      | <input type="radio"/> | <input type="radio"/>                 |

-----

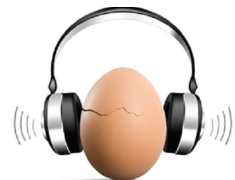

*Make Listening Safe*

3. For each of the entertainment venues listed below, please indicate **how much time do you usually spend in the venue on a single visit.**

|               | Less than an hour     | 1 -3 hours            | More than 3 hours     | I do not visit this venue |
|---------------|-----------------------|-----------------------|-----------------------|---------------------------|
| Bars          | <input type="radio"/> | <input type="radio"/> | <input type="radio"/> | <input type="radio"/>     |
| Clubs         | <input type="radio"/> | <input type="radio"/> | <input type="radio"/> | <input type="radio"/>     |
| Discos        | <input type="radio"/> | <input type="radio"/> | <input type="radio"/> | <input type="radio"/>     |
| Concert halls | <input type="radio"/> | <input type="radio"/> | <input type="radio"/> | <input type="radio"/>     |
| Gyms          | <input type="radio"/> | <input type="radio"/> | <input type="radio"/> | <input type="radio"/>     |
| Festivals     | <input type="radio"/> | <input type="radio"/> | <input type="radio"/> | <input type="radio"/>     |

4. For each of the entertainment venues listed below, please indicate for **how many years have you kept this routine.**

|               | Less than one year    | 1 -3 years            | More than 3 years     | I do not visit this venue |
|---------------|-----------------------|-----------------------|-----------------------|---------------------------|
| Bars          | <input type="radio"/> | <input type="radio"/> | <input type="radio"/> | <input type="radio"/>     |
| Clubs         | <input type="radio"/> | <input type="radio"/> | <input type="radio"/> | <input type="radio"/>     |
| Discos        | <input type="radio"/> | <input type="radio"/> | <input type="radio"/> | <input type="radio"/>     |
| Concert halls | <input type="radio"/> | <input type="radio"/> | <input type="radio"/> | <input type="radio"/>     |
| Gyms          | <input type="radio"/> | <input type="radio"/> | <input type="radio"/> | <input type="radio"/>     |
| Festivals     | <input type="radio"/> | <input type="radio"/> | <input type="radio"/> | <input type="radio"/>     |

5. How would you rate the **overall sound level** in each entertainment venue?

|               | 1. Too high           | 2                     | 3                     | 4                     | 5. Too low            | I do not visit this venue |
|---------------|-----------------------|-----------------------|-----------------------|-----------------------|-----------------------|---------------------------|
| Bars          | <input type="radio"/>     |
| Clubs         | <input type="radio"/>     |
| Discos        | <input type="radio"/>     |
| Concert halls | <input type="radio"/>     |
| Gyms          | <input type="radio"/>     |
| Festivals     | <input type="radio"/>     |

6. When you are in an entertainment venue and the volume of the music is too loud, **how often have you taken one of the following actions?**

|                                          | Always                | Often                 | Sometimes             | Rarely                | Never                 |
|------------------------------------------|-----------------------|-----------------------|-----------------------|-----------------------|-----------------------|
| Leave the venue                          | <input type="radio"/> |
| Wear hearing protection (e.g., earplugs) | <input type="radio"/> |
| Search for a quieter area                | <input type="radio"/> |
| Ask to reduce the volume                 | <input type="radio"/> |

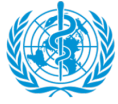

**World Health  
Organization**

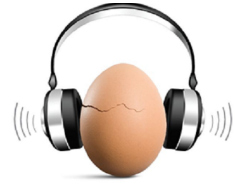

*Make Listening Safe*

7. How often have you **experienced having tinnitus (ear ringing or buzzing) after visiting** an entertainment venue?

- ☐ Never
- ☐ Rarely
- ☐ Sometimes
- ☐ Often
- ☐ Every time

8. In general, **how favorable are you of the following preventive measures in entertainment venues?**

|                                                                    | 1 Not at all          | 2                     | 3                     | 4                     | 5 Completely          |
|--------------------------------------------------------------------|-----------------------|-----------------------|-----------------------|-----------------------|-----------------------|
| Distribution of hearing protection (e.g., earplugs)                | <input type="radio"/> |
| Quiet zones                                                        | <input type="radio"/> |
| Volume limits                                                      | <input type="radio"/> |
| Informational/Awareness material (e.g., leaflets, posters)         | <input type="radio"/> |
| Warnings (e.g., flashing light when music reaches a certain level) | <input type="radio"/> |

9. Please rate your **agreement with the following statements.**

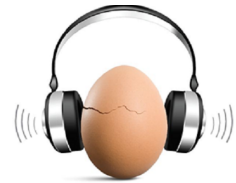

*Make Listening Safe*

|                                                                                                                       | Completely disagree   | Somewhat disagree     | Neither agree nor disagree | Somewhat agree        | Completely agree      |
|-----------------------------------------------------------------------------------------------------------------------|-----------------------|-----------------------|----------------------------|-----------------------|-----------------------|
| I think that earplugs are uncomfortable                                                                               | <input type="radio"/> | <input type="radio"/> | <input type="radio"/>      | <input type="radio"/> | <input type="radio"/> |
| I would appreciate having a place within the entertainment venue where I can rest my ears                             | <input type="radio"/> | <input type="radio"/> | <input type="radio"/>      | <input type="radio"/> | <input type="radio"/> |
| Entertainment venues should provide information about the risks of listening to loud music and how to protect hearing | <input type="radio"/> | <input type="radio"/> | <input type="radio"/>      | <input type="radio"/> | <input type="radio"/> |
| If a law existed limiting the volume in entertainment venues I would feel safer                                       | <input type="radio"/> | <input type="radio"/> | <input type="radio"/>      | <input type="radio"/> | <input type="radio"/> |
| I would like to be notified when the sound in the entertainment venue is too loud                                     | <input type="radio"/> | <input type="radio"/> | <input type="radio"/>      | <input type="radio"/> | <input type="radio"/> |
| Using earplugs does not interfere with my enjoyment of music                                                          | <input type="radio"/> | <input type="radio"/> | <input type="radio"/>      | <input type="radio"/> | <input type="radio"/> |
| I do not see the need of having a quiet zone in an entertainment venue                                                | <input type="radio"/> | <input type="radio"/> | <input type="radio"/>      | <input type="radio"/> | <input type="radio"/> |

I would not pay attention to informational materials when I am visiting an entertainment venue

☐ ☐ ☐ ☐ ☐

Entertainment venues should be free to decide at which level to play music

☐ ☐ ☐ ☐ ☐

I would be annoyed by being notified when the sound level is too high

☐ ☐ ☐ ☐ ☐

I would not mind having to pay for hearing protection (e.g., for earplugs)

☐ ☐ ☐ ☐ ☐

I would spend time in the quiet zone only if I get something in exchange (e.g., a free drink)

☐ ☐ ☐ ☐ ☐

10. True or false? Listening to sounds **above 80 decibels over a period of time** can cause **permanent damage** to your hearing.

- ☐ Definitely true
- ☐ Probably true
- ☐ Probably false
- ☐ Definitely false
- ☐ I don't know

-----



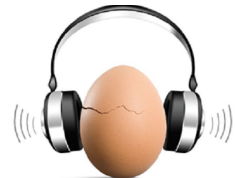

*Make Listening Safe*

11. What is the chance that you will experience hearing loss from listening to loud music?

- ☐ 1 Very low chance
- ☐ 2
- ☐ 3
- ☐ 4
- ☐ 5
- ☐ 6
- ☐ 7 Very high chance

12. Overall, how disruptive would hearing loss be in your life?

- ☐ 1 Not at all disruptive
- ☐ 2
- ☐ 3
- ☐ 4
- ☐ 5
- ☐ 6
- ☐ 7 Extremely disruptive

13. If the World Health Organisation (WHO) informed me about the risks of listening to loud music for a long time, I would be willing to change my listening habits in entertainment venues.

- ☐ 1 Strongly disagree
- ☐ 2
- ☐ 3
- ☐ 4
- ☐ 5
- ☐ 6
- ☐ 7 Strongly agree

To conclude we would like to ask you to answer a few socio-demographic questions about yourself. Your answers to these questions will be very useful for analytical purposes.

---

What is your **gender**?

- ☐ Male
- ☐ Female
- ☐ Other
- ☐ I prefer not to say
- 

What is your **year of birth**?

---

In which **country** do you **currently reside**?

---

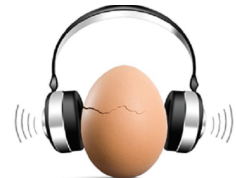

*Make Listening Safe*

What is the **highest level of education** you have **completed**?

- ☐ Less than High School
- ☐ High School / GED
- ☐ Some College
- ☐ 2-year College Degree
- ☐ 4-year College Degree
- ☐ Masters Degree
- ☐ Doctoral Degree
- ☐ Professional Degree (JD, MD)
- ☐ I prefer not to say

Your answers have been recorded. Thank you very much for taking part to this survey. For more information about the "WHO Safe Listening Initiative" visit <https://www.who.int/activities/making-listening-safe>
